# Supplementary material for: Integration of RNAseq transcriptomics and N-glycomics reveal biosynthetic pathways and predict structure-specific N-glycan expression
Source: Royal Society of Chemistry journal article supplement (doi:10.1039/d5sc00467e), 2025-01-01
Supplement: d5sc00467e1.pdf [file d5sc00467e1.pdf]

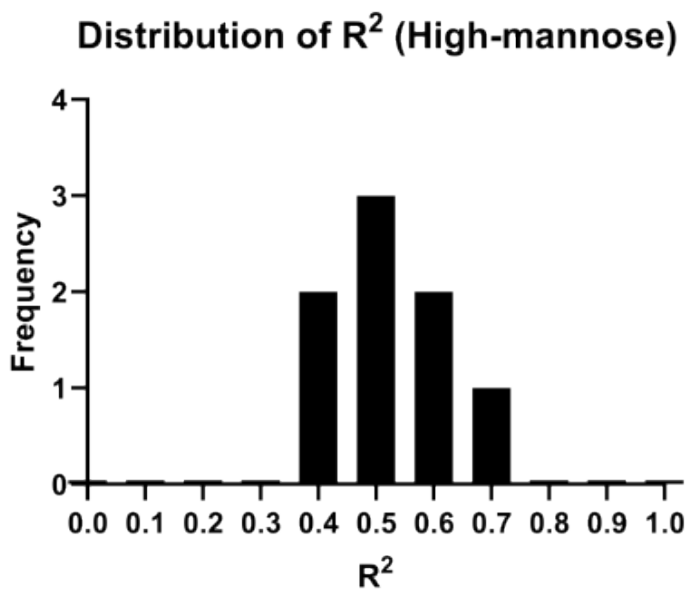

**Figure S1.**  $R^2$  distribution for high-mannose compounds (total number of compounds = 8).

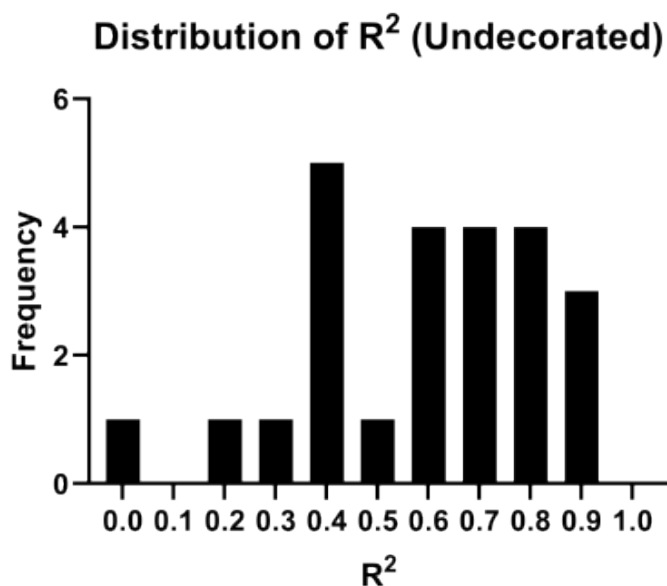

**Distribution of  $R^2$  (Undecorated, >0.1% abundance)**

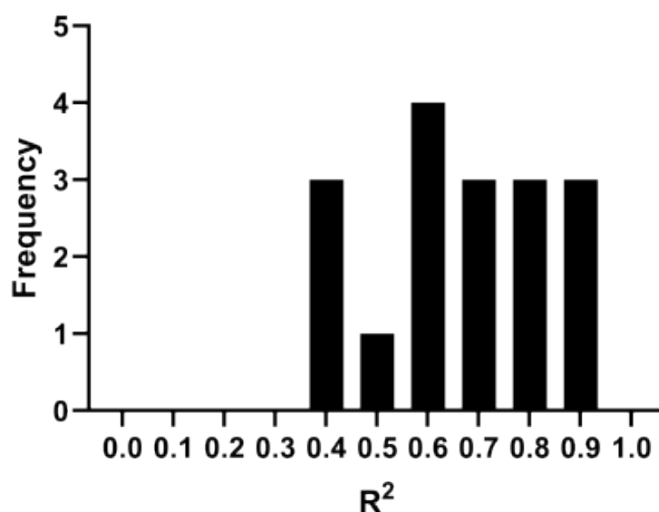

**Figure S2.**  $R^2$  distribution for undecorated compounds (total number of compounds = 25). Applying an abundance cut-off of >0.1% abundance (total number of compounds = 18) filtered out the models with very poor performance ( $R^2 < 0.3$ )

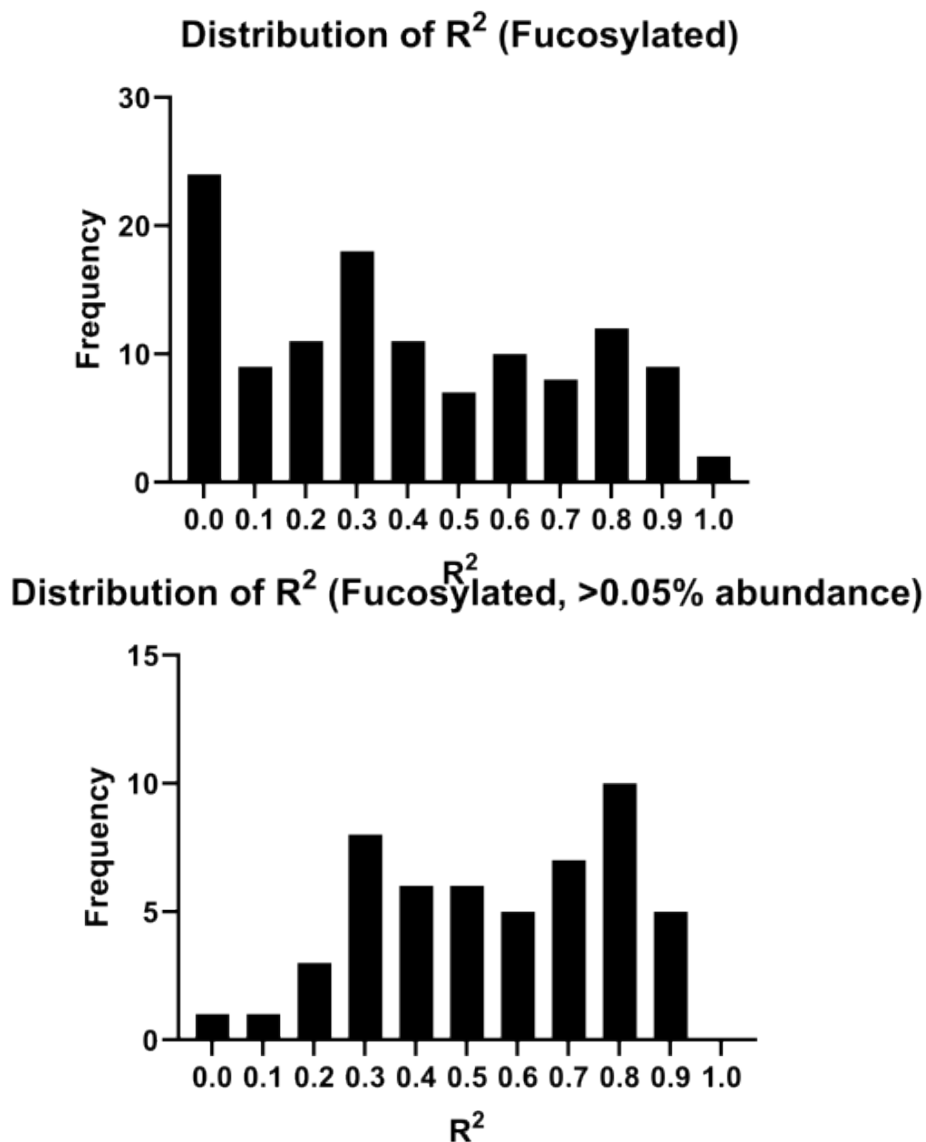

**Figure S3.**  $R^2$  distribution for fucosylated compounds (total number of compounds = 121). Applying an abundance cut-off of  $>0.05\%$  abundance (total number of compounds = 52) filtered out the models with very poor performance ( $R^2 < 0.3$ )

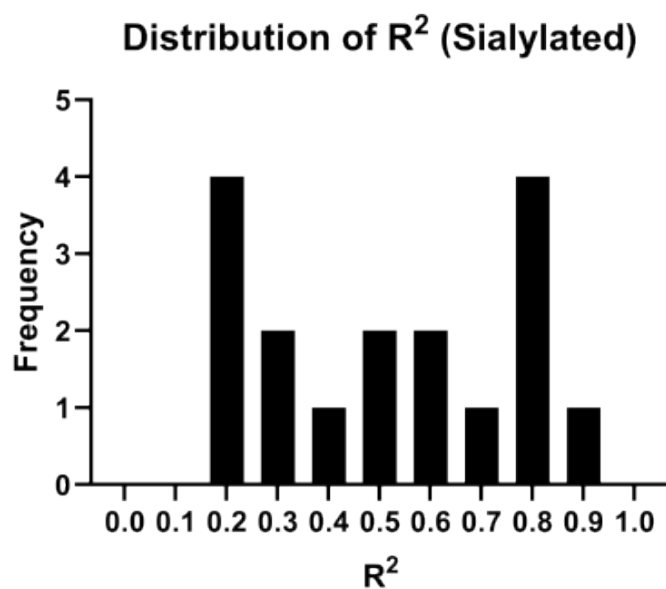

**Figure S4.**  $R^2$  distribution for sialylated compounds (total number of compounds = 17).

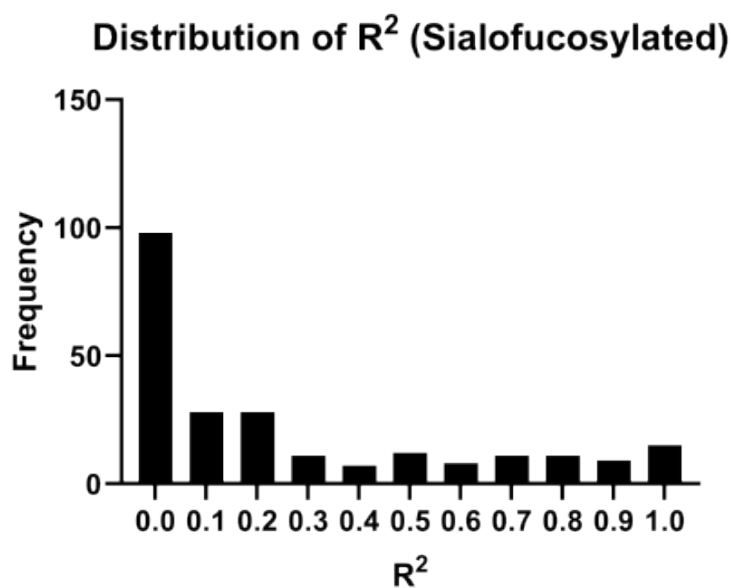

**Distribution of  $R^2$  (Sialofucosylated, >0.05% abundance)**

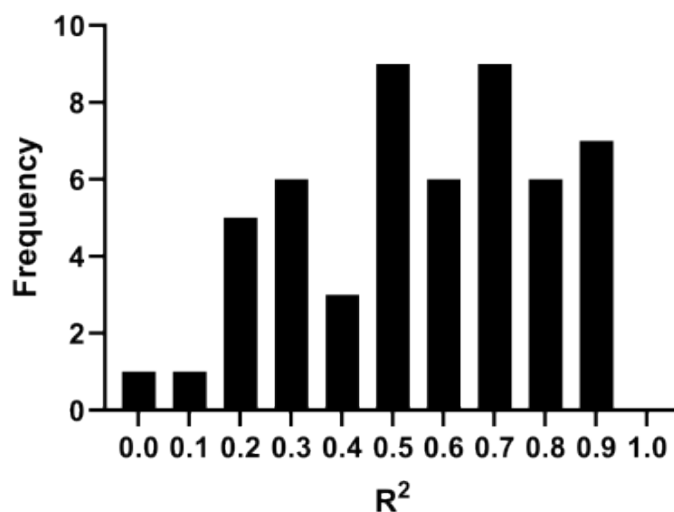

**Figure S5.**  $R^2$  distribution for sialofucosylated compounds (total number of compounds = 238). Applying an abundance cut-off of >0.05% abundance (total number of compounds = 41) filtered out the models with very poor performance ( $R^2 < 0.3$ )
