# Supplementary material for: Integration of RNAseq transcriptomics and N-glycomics reveal biosynthetic pathways and predict structure-specific N-glycan expression
Source: Royal Society of Chemistry journal article supplement (doi:10.1039/d5sc00467e), 2025-01-01
Supplement: d5sc00467e2.xlsx [file d5sc00467e2.xlsx]

## Sheet: Summary best models
N-glycan	N-glycan type	N-glycan	Regression model	Validation R2	Average abundance
3210	Fucosylated	H3N2F1S0	Coarse Gaussian SVM	0.25	0.214906
3310	Fucosylated	H3N3F1S0	Squared exponential Gaussian process regression	0.82	0.298491
3400	Undecorated	H3N4F0S0	Medium Gaussian SVM	0.43	0.109623
3410	Fucosylated	H3N4F1S0	Rational Quadratic Gaussian process regression	0.79	0.470943
3510	Fucosylated	H3N5F1S0	Matern 5/2 GPR	0.71	0.192264
3610	Fucosylated	H3N6F1S0	Quadratic SVM	0.56	0.059623
4300	Undecorated	H4N3F0S0	Trilayered neural network	0.88	0.435283
4301	Sialylated	H4N3F0S1	Trilayered neural network	0.24	0.163585
4310	Fucosylated	H4N3F1S0	Quadratic SVM	0.82	0.488113
4311	Sialofucosylated	H4N3F1S1	Rational quadratic Gaussian process regression	0.8	0.217925
4320	Fucosylated	H4N3F2S0	Cubic SVM	0.79	0.056604
4400	Undecorated	H4N4F0S0	Cubic SVM	0.39	0.202075
4410	Fucosylated	H4N4F1S0	Cubic SVM	0.43	0.309434
4411	Sialofucosylated	H4N4F1S1	Boosted tree ensemble	0.51	0.197925
4420	Fucosylated	H4N4F2S0	Bagged Trees	0.29	0.064906
4500	Undecorated	H4N5F0S0	SVM Kernel	0.42	0.122264
4510	Fucosylated	H4N5F1S0	Matern 5/2 GPR	0.5	0.244528
4511	Sialofucosylated	H4N5F1S1	Linear SVM	0.59	0.15434
4520	Fucosylated	H4N5F2S0	Squared exponential Gaussian process regression	0.48	0.051698
4530	Fucosylated	H4N5F3S0	Squared exponential Gaussian process regression	0.8	0.05717
5200	High-mannose	H5N2F0S0	Rational quadratic Gaussian process regression	0.46	3.7766
5300	Undecorated	H5N3F0S0	Boosted tree ensemble	0.66	0.388679
5301	Sialylated	H5N3F0S1	Fine tree	0.49	0.522453
5310	Fucosylated	H5N3F1S0	Quadratic SVM	0.57	0.334717
5311	Sialofucosylated	H5N3F1S1	SVM kernel	0.44	0.266604
5400	Undecorated	H5N4F0S0	Bilayered neural network	0.86	1.8366
5401	Sialylated	H5N4F0S1	Medium neural network	0.9	2.21434
5402	Sialylated	H5N4F0S2	Cubic SVM	0.3	1.1
5410	Fucosylated	H5N4F1S0	Matern 5/2 GPR	0.86	2.48396
5411	Sialofucosylated	H5N4F1S1	Medium neural network	0.88	4.2834
5412	Sialofucosylated	H5N4F1S2	Rational quadratic Gaussian process regression	0.9	2.49585
5420	Fucosylated	H5N4F2S0	Cubic SVM	0.79	0.555849
5421	Sialofucosylated	H5N4F2S1	Matern 5/2 GPR	0.9	0.52434
5422	Sialofucosylated	H5N4F2S2	Cubic SVM	0.88	0.053208
5430	Fucosylated	H5N4F3S0	Cubic SVM	0.83	0.23434
5431	Sialofucosylated	H5N4F3S1	Quadratic SVM	0.67	0.052642
5500	Undecorated	H5N5F0S0	Trilayered neural network	0.6	0.504717
5501	Sialylated	H5N5F0S1	Wide neural network	0.56	1.18226
5510	Fucosylated	H5N5F1S0	Trilayered neural network	0.37	1.11547
5511	Sialofucosylated	H5N5F1S1	Bilayered neural network	0.71	1.94755
5511	Sialofucosylated	H5N5F1S1	Trilayered neural network	0.85	1.94755
5512	Sialofucosylated	H5N5F1S2	Medium neural network	0.56	1.66887
5520	Fucosylated	H5N5F2S0	Cubic SVM	0.7	0.185094
5521	Sialofucosylated	H5N5F2S1	Exponential GPR	0.61	0.340189
5530	Fucosylated	H5N5F3S0	Cubic SVM	0.88	0.069245
5610	Fucosylated	H5N6F1S0	Trilayered neural network	0.37	0.127736
5611	Sialofucosylated	H5N6F1S1	Bagged trees	0.12	0.063396
6200	High-mannose	H6N2F0S0	Boosted tree ensemble	0.54	4.44528
6210	Fucosylated	H6N2F1S0	Quadratic SVM	0.03	0.052075
6300	Undecorated	H6N3F0S0	Rational quadratic GPR	0.73	0.734717
6301	Sialylated	H6N3F0S1	Quadratic SVM	0.41	0.791321
6310	Fucosylated	H6N3F1S0	Medium Gaussian SVM	0.38	0.204906
6311	Sialofucosylated	H6N3F1S1	Fine tree	0.49	0.115849
6400	Undecorated	H6N4F0S0	Boosted tree ensemble	0.62	0.428868
6401	Sialylated	H6N4F0S1	Cubic SVM	0.2	0.30717
6410	Fucosylated	H6N4F1S0	Efficient Linear Least Squares	0.31	0.351509
6411	Sialofucosylated	H6N4F1S1	Cubic SVM	0.58	0.172075
6500	Undecorated	H6N5F0S0	Squared exponential Gaussian process regression	0.79	0.753585
6501	Sialylated	H6N5F0S1	Trilayered neural network	0.83	0.85717
6502	Sialylated	H6N5F0S2	Trilayered neural network	0.75	0.772642
6503	Sialylated	H6N5F0S3	Rational quadratic GPR	0.45	0.462075
6510	Fucosylated	H6N5F1S0	Boosted Trees	0.53	1.79132
6511	Sialofucosylated	H6N5F1S1	Linear SVM	0.78	1.67641
6512	Sialofucosylated	H6N5F1S2	Squared exponential GPR	0.85	2.38698
6513	Sialofucosylated	H6N5F1S3	Cubic SVM	0.42	0.238868
6520	Fucosylated	H6N5F2S0	Matern 5/2 GPR	0.83	0.24434
6521	Sialofucosylated	H6N5F2S1	Linear SVM	0.76	0.311887
6522	Sialofucosylated	H6N5F2S2	Cubic SVM	0.73	0.191509
6530	Fucosylated	H6N5F3S0	Rational Quadratic Gaussian process regression	0.47	0.058679
6531	Sialofucosylated	H6N5F3S1	Exponential GPR	0.71	0.086226
6540	Fucosylated	H6N5F4S0	Cubic SVM	0.27	0.070943
6600	Undecorated	H6N6F0S0	Cubic SVM	0.63	0.311509
6610	Fucosylated	H6N6F1S0	Wide Neural Network	0.4	1.46076
6611	Sialofucosylated	H6N6F1S1	Bilayered Neural Network	0.43	1.04415
6612	Sialofucosylated	H6N6F1S2	Quadratic SVM	0.2	0.673962
6613	Sialofucosylated	H6N6F1S3	Fine Tree	0.26	0.25717
6620	Fucosylated	H6N6F2S0	Trilayered neural network	0.88	0.326226
6621	Sialofucosylated	H6N6F2S1	Matern 5/2 GPR	0.87	0.199623
6622	Sialofucosylated	H6N6F2S2	Cubic SVM	0.45	0.078868
6630	Fucosylated	H6N6F3S0	Trilayered neural network	0.94	0.170189
6631	Sialofucosylated	H6N6F3S1	Matern 5/2 GPR	0.73	0.076981
6640	Fucosylated	H6N6F4S0	Matern 5/2 GPR	0.68	0.066981
6710	Fucosylated	H6N7F1S0	Cubic SVM	0.33	0.100189
7200	High-mannose	H7N2F0S0	Cubic SVM	0.41	5.40113
7210	Fucosylated	H7N2F1S0	Least Squares Regression Kernel	0.29	0.065283
7400	Undecorated	H7N4F0S0	Cubic SVM	0.87	0.175283
7401	Sialylated	H7N4F0S1	Cubic SVM	0.59	0.156038
7410	Fucosylated	H7N4F1S0	Boosted Trees	0.54	0.133774
7411	Sialofucosylated	H7N4F1S1	Linear SVM	0.6	0.096604
7600	Undecorated	H7N6F0S0	Trilayered neural network	0.82	0.543774
7601	Sialylated	H7N6F0S1	Linear SVM	0.22	0.520755
7602	Sialylated	H7N6F0S2	Matern 5/2 GPR	0.32	0.471698
7603	Sialylated	H7N6F0S3	Cubic SVM	0.68	0.191887
7610	Fucosylated	H7N6F1S0	Cubic SVM	0.62	1.10868
7611	Sialofucosylated	H7N6F1S1	Bossted tree ensemble	0.82	1.56226
7612	Sialofucosylated	H7N6F1S2	Boosted Trees	0.82	1.71094
7613	Sialofucosylated	H7N6F1S3	SVM Kernel	0.32	0.535283
7620	Fucosylated	H7N6F2S0	Boosted Trees	0.49	0.193962
7621	Sialofucosylated	H7N6F2S1	Fine Tree	0.79	0.189623
7622	Sialofucosylated	H7N6F2S2	SVM Kernel	0.34	0.106226
7630	Fucosylated	H7N6F3S0	Boosted Trees	0.64	0.055094
7631	Sialofucosylated	H7N6F3S1	SVM Kernel	0.18	0.116415
7700	Undecorated	H7N7F0S0	Trilayered neural network	0.61	0.361321
7701	Sialylated	H7N7F0S1	Least squares Regression Kernel	0.2	0.21717
7711	Sialofucosylated	H7N7F1S1	Matern 5/2 GPR	0.46	0.674151
7712	Sialofucosylated	H7N7F1S2	Cubic SVM	0.45	0.5
7713	Sialofucosylated	H7N7F1S3	Quadratic SVM	0.2	0.188302
7720	Fucosylated	H7N7F2S0	Matern 5/2 GPR	0.87	0.290755
7721	Sialofucosylated	H7N7F2S1	Matern 5/2 GPR	0.74	0.121887
7730	Fucosylated	H7N7F3S0	Cubic SVM	0.79	0.129057
7740	Fucosylated	H7N7F4S0	Squared exponential Gaussian process regression	0.7	0.055094
8200	High-mannose	H8N2F0S0	Linear SVM	0.48	6.82
8210	Fucosylated	H8N2F1S0	Medium Gaussian SVM	0.05	0.078113
8700	Undecorated	H8N7F0S0	Quadratic SVM	0.81	0.187547
8701	Sialylated	H8N7F0S1	Squared exponential GPR	0.8	0.209434
8710	Fucosylated	H8N7F1S0	Cubic SVM	0.71	0.380377
8711	Sialofucosylated	H8N7F1S1	Linear SVM	0.47	0.298302
8712	Sialofucosylated	H8N7F1S2	Boosted Trees	0.65	0.299245
8713	Sialofucosylated	H8N7F1S3	Bagged Trees	0.28	0.060566
8760	Fucosylated	H8N7F6S0	Cubic SVM	0.73	0.123962
8761	Sialofucosylated	H8N7F6S1	Efficient Linear Least Squares	0.28	0.100189
8762	Sialofucosylated	H8N7F6S2	Boosted Trees	0.52	0.089623
8800	Undecorated	H8N8F0S0	Trilayered neural network	0.5	0.109057
8810	Fucosylated	H8N8F1S0	Bilayered Neural Network	0.3	0.621887
8811	Sialofucosylated	H8N8F1S1	Cubic SVM	0.25	0.181887
8812	Sialofucosylated	H8N8F1S2	Quadratic SVM	0.24	0.217547
8820	Fucosylated	H8N8F2S0	Quadratic SVM	0.76	0.087547
8860	Fucosylated	H8N8F6S0	Fine Tree	0.33	0.235283
9200	High-mannose	H9N2F0S0	Trilayered neural network	0.56	6.99811
9810	Fucosylated	H9N8F1S0	Quadratic SVM	0.66	0.197736
9811	Sialofucosylated	H9N8F1S1	Linear SVM	0.52	0.194906
9812	Sialofucosylated	H9N8F1S2	Cubic SVM	0.64	0.203962
9860	Fucosylated	H9N8F6S0	Quadratic SVM	0.62	0.058113
9861	Sialofucosylated	H9N8F6S1	Fine Tree	0.74	0.070189
9910	Fucosylated	H9N9F1S0	Cubic SVM	0.2	0.37283
9911	Sialofucosylated	H9N9F1S1	Boosted Trees	0.26	0.072075
9912	Sialofucosylated	H9N9F1S2	Boosted Trees	0.54	0.125472
9960	Fucosylated	H9N9F6S0	Trilayered neural network	0.35	0.182264

## Sheet: 3210
Specific Type	Model Type		RMSE (Validation)	MSE (Validation)	R2 (Validation)
Linear regression	Linear Regression	Tested	0.440861	0.194358	-2.97845
Interactions linear regression	Linear Regression	Failed	NaN	NaN	NaN
Robust linear regression	Linear Regression	Failed	NaN	NaN	NaN
Stepwise linear regression	Stepwise Linear Regression	Failed	NaN	NaN	NaN
Fine tree	Tree	Tested	0.234451	0.0549675	-0.123893
Medium tree	Tree	Tested	0.234699	0.0550835	-0.126264
Coarse tree	Tree	Tested	0.221152	0.0489081	2.22045e-16
Linear SVM	SVM	Tested	0.223551	0.0499751	-0.0218158
Quadratic SVM	SVM	Tested	0.227094	0.0515716	-0.0544587
Cubic SVM	SVM	Tested	0.224307	0.0503134	-0.0287329
Fine Gaussian SVM	SVM	Tested	0.209421	0.0438571	0.103275
Medium Gaussian SVM	SVM	Tested	0.193365	0.0373898	0.235509
Coarse Gaussian SVM	SVM	Tested	0.19125	0.0365765	0.252139
Efficient Linear Least Squares	Efficient Linear	Tested	0.195283	0.0381356	0.22026
Efficient Linear SVM	Efficient Linear	Tested	0.209343	0.0438244	0.103945
Boosted trees	Ensemble	Tested	0.211647	0.0447945	0.08411
Bagged trees	Ensemble	Tested	0.199129	0.0396523	0.18925
Squared exponential GPR	Gaussian Process Regression	Tested	0.231452	0.0535702	-0.0953229
Matern 5/2 GPR	Gaussian Process Regression	Tested	0.231144	0.0534277	-0.0924087
Exponential GPR	Gaussian Process Regression	Tested	0.216848	0.047023	0.0385449
Rational quadratic GPR	Gaussian Process Regression	Tested	0.231452	0.0535702	-0.0953229
Narrow neural network	Neural Network	Tested	0.398152	0.158525	-2.24129
Medium neural network	Neural Network	Tested	0.408455	0.166835	-2.4112
Wide neural network	Neural Network	Tested	0.433773	0.188159	-2.8472
Bilayered neural network	Neural Network	Tested	0.304409	0.0926647	-0.894668
Trilayered neural network	Neural Network	Tested	0.274127	0.0751456	-0.536465
SVM kernel	Kernel	Tested	0.212074	0.0449755	0.0804077
Least squares regression kernel	Kernel	Tested	0.198708	0.0394848	0.192675

## Sheet: 3300
Specific Type	Model Type		RMSE (Validation)	MSE (Validation)	R2 (Validation)
Linear regression	Linear Regression	Tested	0.125169	0.0156672	-2.4135
Interactions linear regression	Linear Regression	Canceled	NaN	NaN	NaN
Robust linear regression	Linear Regression	Failed	NaN	NaN	NaN
Stepwise linear regression	Stepwise Linear Regression	Canceled	NaN	NaN	NaN
Fine tree	Tree	Tested	0.0653596	0.00427188	0.0648915
Medium tree	Tree	Tested	0.0654718	0.00428655	0.06168
Coarse tree	Tree	Tested	0.0675894	0.00456833	1.11022e-16
Linear SVM	SVM	Tested	0.0475134	0.00225753	0.508142
Quadratic SVM	SVM	Tested	0.0405275	0.00164248	0.642145
Cubic SVM	SVM	Tested	0.0394935	0.00155973	0.660173
Fine Gaussian SVM	SVM	Tested	0.0660618	0.00436416	0.0491587
Medium Gaussian SVM	SVM	Tested	0.0486966	0.00237136	0.483339
Coarse Gaussian SVM	SVM	Tested	0.0596816	0.00356189	0.223953
Boosted trees	Ensemble	Tested	0.0531361	0.00282345	0.381952
Bagged trees	Ensemble	Tested	0.0530603	0.00281539	0.383715
Squared exponential GPR	Gaussian Process Regression	Tested	0.0401701	0.00161364	0.648429
Matern 5/2 GPR	Gaussian Process Regression	Tested	0.0407256	0.00165858	0.638637
Exponential GPR	Gaussian Process Regression	Tested	0.0440458	0.00194003	0.577316
Rational quadratic GPR	Gaussian Process Regression	Tested	0.0401701	0.00161364	0.648429
Narrow neural network	Neural Network	Tested	0.335344	0.112456	-23.5013
Medium neural network	Neural Network	Tested	0.379455	0.143986	-30.3709
Wide neural network	Neural Network	Tested	0.369678	0.136662	-28.7752
Bilayered neural network	Neural Network	Tested	0.0985091	0.00970405	-1.11427
Trilayered neural network	Neural Network	Tested	0.125515	0.0157541	-2.43243
SVM kernel	Kernel	Tested	0.0460752	0.00212292	0.537469
Least squares regression kernel	Kernel	Tested	0.0525051	0.00275678	0.399366

## Sheet: 3310
Specific Type	Model Type		RMSE (Validation)	MSE (Validation)	R2 (Validation)
Linear regression	Linear Regression	Tested	0.309355	0.0957004	-0.33253
Interactions linear regression	Linear Regression	Failed	NaN	NaN	NaN
Robust linear regression	Linear Regression	Failed	NaN	NaN	NaN
Stepwise linear regression	Stepwise Linear Regression	Failed	NaN	NaN	NaN
Fine tree	Tree	Tested	0.150677	0.0227035	0.690063
Medium tree	Tree	Tested	0.197876	0.0391551	0.465474
Coarse tree	Tree	Tested	0.270651	0.073252	-6.66134e-16
Linear SVM	SVM	Tested	0.147999	0.0219036	0.700983
Quadratic SVM	SVM	Tested	0.116625	0.0136013	0.814322
Cubic SVM	SVM	Tested	0.120157	0.0144377	0.802904
Fine Gaussian SVM	SVM	Tested	0.259772	0.0674813	0.0787783
Medium Gaussian SVM	SVM	Tested	0.180793	0.0326861	0.553785
Coarse Gaussian SVM	SVM	Tested	0.238919	0.0570821	0.220743
Efficient Linear Least Squares	Efficient Linear	Tested	0.289724	0.0839402	-0.145911
Efficient Linear SVM	Efficient Linear	Tested	0.193998	0.0376352	0.486223
Boosted trees	Ensemble	Tested	0.156599	0.0245232	0.665221
Bagged trees	Ensemble	Tested	0.159086	0.0253083	0.654504
Squared exponential GPR	Gaussian Process Regression	Tested	0.114855	0.0131916	0.819915
Matern 5/2 GPR	Gaussian Process Regression	Tested	0.117648	0.013841	0.811049
Exponential GPR	Gaussian Process Regression	Tested	0.134512	0.0180934	0.752998
Rational quadratic GPR	Gaussian Process Regression	Tested	0.114855	0.0131916	0.819915
Narrow neural network	Neural Network	Tested	0.258968	0.0670646	0.0844666
Medium neural network	Neural Network	Tested	0.398866	0.159094	-1.17188
Wide neural network	Neural Network	Tested	0.402993	0.162404	-1.21705
Bilayered neural network	Neural Network	Tested	0.26617	0.0708465	0.0328386
Trilayered neural network	Neural Network	Tested	0.174976	0.0306165	0.582039
SVM kernel	Kernel	Tested	0.128474	0.0165056	0.774674
Least squares regression kernel	Kernel	Tested	0.183453	0.0336552	0.540556

## Sheet: 3320
Specific Type	Model Type		RMSE (Validation)	MSE (Validation)	R2 (Validation)
Linear regression	Linear Regression	Tested	0.043179	0.00186443	-19.1162
Interactions linear regression	Linear Regression	Failed	NaN	NaN	NaN
Robust linear regression	Linear Regression	Failed	NaN	NaN	NaN
Stepwise linear regression	Stepwise Linear Regression	Failed	NaN	NaN	NaN
Fine tree	Tree	Tested	0.0110532	0.000122173	-0.375844
Medium tree	Tree	Tested	0.00908605	8.25562e-05	0.0702949
Coarse tree	Tree	Tested	0.00942328	8.87983e-05	-2.22045e-16
Linear SVM	SVM	Tested	0.00939517	8.82692e-05	0.00595845
Quadratic SVM	SVM	Tested	0.00939517	8.82692e-05	0.00595845
Cubic SVM	SVM	Tested	0.00939517	8.82692e-05	0.00595845
Fine Gaussian SVM	SVM	Tested	0.00939517	8.82692e-05	0.00595845
Medium Gaussian SVM	SVM	Tested	0.00939517	8.82692e-05	0.00595845
Coarse Gaussian SVM	SVM	Tested	0.00939517	8.82692e-05	0.00595845
Efficient Linear Least Squares	Efficient Linear	Tested	0.0097934	9.59107e-05	-0.0800965
Efficient Linear SVM	Efficient Linear	Tested	0.0151971	0.000230952	-1.60087
Boosted trees	Ensemble	Tested	0.00991375	9.82823e-05	-0.106805
Bagged trees	Ensemble	Tested	0.00900444	8.10799e-05	0.0869202
Squared exponential GPR	Gaussian Process Regression	Tested	0.0113046	0.000127795	-0.439156
Matern 5/2 GPR	Gaussian Process Regression	Tested	0.0111469	0.000124253	-0.399276
Exponential GPR	Gaussian Process Regression	Tested	0.0103786	0.000107715	-0.213027
Rational quadratic GPR	Gaussian Process Regression	Tested	0.0113091	0.000127896	-0.440303
Narrow neural network	Neural Network	Tested	0.321866	0.103598	-1165.66
Medium neural network	Neural Network	Tested	0.444518	0.197596	-2224.22
Wide neural network	Neural Network	Tested	0.486139	0.236331	-2660.44
Bilayered neural network	Neural Network	Tested	0.120418	0.0145005	-162.297
Trilayered neural network	Neural Network	Tested	0.097231	0.00945387	-105.465
SVM kernel	Kernel	Tested	0.0151971	0.000230952	-1.60087
Least squares regression kernel	Kernel	Tested	0.00988304	9.76744e-05	-0.0999585

## Sheet: 3400
Specific Type	Model Type		RMSE (Validation)	MSE (Validation)	R2 (Validation)
Linear regression	Linear Regression	Tested	0.522342	0.272842	-42.0531
Interactions linear regression	Linear Regression	Canceled	NaN	NaN	NaN
Robust linear regression	Linear Regression	Failed	NaN	NaN	NaN
Stepwise linear regression	Stepwise Linear Regression	Canceled	NaN	NaN	NaN
Fine tree	Tree	Tested	0.149578	0.0223735	-0.117924
Medium tree	Tree	Tested	0.149561	0.0223685	-0.117671
Coarse tree	Tree	Tested	0.141469	0.0200135	0
Linear SVM	SVM	Tested	0.0610884	0.0037318	0.41114
Quadratic SVM	SVM	Tested	0.075076	0.00563641	0.110602
Cubic SVM	SVM	Tested	0.0815557	0.00665134	-0.0495489
Fine Gaussian SVM	SVM	Tested	0.0754274	0.00568929	0.102257
Medium Gaussian SVM	SVM	Tested	0.0599723	0.00359668	0.432461
Coarse Gaussian SVM	SVM	Tested	0.0713044	0.00508431	0.19772
Boosted trees	Ensemble	Tested	0.14818	0.0219574	-0.0971325
Bagged trees	Ensemble	Tested	0.144027	0.0207438	-0.0364922
Squared exponential GPR	Gaussian Process Regression	Tested	0.0748053	0.00559584	0.117004
Matern 5/2 GPR	Gaussian Process Regression	Tested	0.0756487	0.00572273	0.0969801
Exponential GPR	Gaussian Process Regression	Tested	0.0767121	0.00588475	0.0714153
Rational quadratic GPR	Gaussian Process Regression	Tested	0.0748053	0.00559584	0.117004
Narrow neural network	Neural Network	Tested	0.238969	0.0571061	-8.01108
Medium neural network	Neural Network	Tested	0.420383	0.176722	-26.8859
Wide neural network	Neural Network	Tested	0.489814	0.239918	-36.8579
Bilayered neural network	Neural Network	Tested	0.242175	0.0586487	-8.25449
Trilayered neural network	Neural Network	Tested	0.141686	0.0200748	-2.16772
SVM kernel	Kernel	Tested	0.0775251	0.00601014	0.0516279
Least squares regression kernel	Kernel	Tested	0.0821347	0.00674611	-0.0645032

## Sheet: 3410
Specific Type	Model Type		RMSE (Validation)	MSE (Validation)	R2 (Validation)
Linear regression	Linear Regression	Tested	0.583772	0.34079	-0.563763
Interactions linear regression	Linear Regression	Failed	NaN	NaN	NaN
Robust linear regression	Linear Regression	Failed	NaN	NaN	NaN
Stepwise linear regression	Stepwise Linear Regression	Failed	NaN	NaN	NaN
Fine tree	Tree	Tested	0.28006	0.0784334	0.62242
Medium tree	Tree	Tested	0.42615	0.181603	0.125758
Coarse tree	Tree	Tested	0.45577	0.207727	-8.88178e-16
Linear SVM	SVM	Tested	0.298976	0.0893868	0.56969
Quadratic SVM	SVM	Tested	0.2244	0.0503553	0.757589
Cubic SVM	SVM	Tested	0.221219	0.0489377	0.764413
Fine Gaussian SVM	SVM	Tested	0.442597	0.195892	0.0569713
Medium Gaussian SVM	SVM	Tested	0.334491	0.111885	0.461386
Coarse Gaussian SVM	SVM	Tested	0.422172	0.17823	0.142
Efficient Linear Least Squares	Efficient Linear	Tested	0.74227	0.550965	-1.65236
Efficient Linear SVM	Efficient Linear	Tested	0.492652	0.242706	-0.168391
Boosted trees	Ensemble	Tested	0.308054	0.094897	0.543164
Bagged trees	Ensemble	Tested	0.337576	0.113958	0.451405
Squared exponential GPR	Gaussian Process Regression	Tested	0.208792	0.043594	0.790138
Matern 5/2 GPR	Gaussian Process Regression	Tested	0.211807	0.0448623	0.784032
Exponential GPR	Gaussian Process Regression	Tested	0.237017	0.056177	0.729563
Rational quadratic GPR	Gaussian Process Regression	Tested	0.208792	0.043594	0.790138
Narrow neural network	Neural Network	Tested	0.351679	0.123678	0.404611
Medium neural network	Neural Network	Tested	0.492468	0.242525	-0.167519
Wide neural network	Neural Network	Tested	0.428488	0.183602	0.116138
Bilayered neural network	Neural Network	Tested	0.215493	0.0464374	0.77645
Trilayered neural network	Neural Network	Tested	0.405653	0.164554	0.207834
SVM kernel	Kernel	Tested	0.247892	0.0614506	0.704176
Least squares regression kernel	Kernel	Tested	0.324534	0.105322	0.492978

## Sheet: 3420
Specific Type	Model Type		RMSE (Validation)	MSE (Validation)	R2 (Validation)
Linear regression	Linear Regression	Tested	0.062917	0.00395855	-1.19194
Interactions linear regression	Linear Regression	Failed	NaN	NaN	NaN
Robust linear regression	Linear Regression	Failed	NaN	NaN	NaN
Stepwise linear regression	Stepwise Linear Regression	Failed	NaN	NaN	NaN
Fine tree	Tree	Tested	0.0300596	0.000903582	0.452522
Medium tree	Tree	Tested	0.0411044	0.00168957	-0.0237065
Coarse tree	Tree	Tested	0.0406257	0.00165045	2.22045e-16
Linear SVM	SVM	Tested	0.065016	0.00422708	-1.56117
Quadratic SVM	SVM	Tested	0.0668545	0.00446952	-1.70807
Cubic SVM	SVM	Tested	0.0668203	0.00446495	-1.7053
Fine Gaussian SVM	SVM	Tested	0.0679051	0.0046111	-1.79385
Medium Gaussian SVM	SVM	Tested	0.0670437	0.00449485	-1.72342
Coarse Gaussian SVM	SVM	Tested	0.0653828	0.00427491	-1.59016
Efficient Linear Least Squares	Efficient Linear	Tested	0.0411946	0.00169699	-0.0282043
Efficient Linear SVM	Efficient Linear	Tested	0.0807189	0.00651554	-2.94775
Boosted trees	Ensemble	Tested	0.0310038	0.000961237	0.417589
Bagged trees	Ensemble	Tested	0.0351482	0.0012354	0.251477
Squared exponential GPR	Gaussian Process Regression	Tested	0.0215854	0.000465928	0.717696
Matern 5/2 GPR	Gaussian Process Regression	Tested	0.022243	0.000494751	0.700232
Exponential GPR	Gaussian Process Regression	Tested	0.0252949	0.00063983	0.612329
Rational quadratic GPR	Gaussian Process Regression	Tested	0.0215854	0.000465928	0.717696
Narrow neural network	Neural Network	Tested	0.414421	0.171745	-103.06
Medium neural network	Neural Network	Tested	0.447718	0.200451	-120.453
Wide neural network	Neural Network	Tested	0.395198	0.156181	-93.6298
Bilayered neural network	Neural Network	Tested	0.104247	0.0108675	-5.58457
Trilayered neural network	Neural Network	Tested	0.0728888	0.00531277	-2.21899
SVM kernel	Kernel	Tested	0.0844349	0.00712925	-3.31959
Least squares regression kernel	Kernel	Tested	0.0333468	0.00111201	0.326235

## Sheet: 3430
Specific Type	Model Type		RMSE (Validation)	MSE (Validation)	R2 (Validation)
Linear regression	Linear Regression	Tested	0.0165915	0.000275277	-22.7774
Interactions linear regression	Linear Regression	Failed	NaN	NaN	NaN
Robust linear regression	Linear Regression	Failed	NaN	NaN	NaN
Stepwise linear regression	Stepwise Linear Regression	Failed	NaN	NaN	NaN
Fine tree	Tree	Tested	0.00622017	3.86905e-05	-0.355959
Medium tree	Tree	Tested	0.00551573	3.04233e-05	-0.0662242
Coarse tree	Tree	Tested	0.00534169	2.85337e-05	0
Linear SVM	SVM	Tested	0.00543344	2.95223e-05	-0.0346473
Quadratic SVM	SVM	Tested	0.00543344	2.95223e-05	-0.0346473
Cubic SVM	SVM	Tested	0.00543344	2.95223e-05	-0.0346473
Fine Gaussian SVM	SVM	Tested	0.00543344	2.95223e-05	-0.0346473
Medium Gaussian SVM	SVM	Tested	0.00543344	2.95223e-05	-0.0346473
Coarse Gaussian SVM	SVM	Tested	0.00543344	2.95223e-05	-0.0346473
Efficient Linear Least Squares	Efficient Linear	Tested	0.00887338	7.87369e-05	-1.75944
Efficient Linear SVM	Efficient Linear	Tested	0.0192725	0.000371429	-12.0172
Boosted trees	Ensemble	Tested	0.00563484	3.17514e-05	-0.112769
Bagged trees	Ensemble	Tested	0.00549274	3.01702e-05	-0.0573556
Squared exponential GPR	Gaussian Process Regression	Tested	0.00545181	2.97223e-05	-0.0416563
Matern 5/2 GPR	Gaussian Process Regression	Tested	0.00545093	2.97126e-05	-0.0413189
Exponential GPR	Gaussian Process Regression	Tested	0.00543743	2.95657e-05	-0.0361681
Rational quadratic GPR	Gaussian Process Regression	Tested	0.00546112	2.98238e-05	-0.0452158
Narrow neural network	Neural Network	Tested	0.248086	0.0615469	-2155.99
Medium neural network	Neural Network	Tested	0.560675	0.314357	-11016
Wide neural network	Neural Network	Tested	0.526233	0.276921	-9704.08
Bilayered neural network	Neural Network	Tested	0.0873132	0.00762359	-266.179
Trilayered neural network	Neural Network	Tested	0.107603	0.0115784	-404.779
SVM kernel	Kernel	Tested	0.0192725	0.000371429	-12.0172
Least squares regression kernel	Kernel	Tested	0.00544126	2.96073e-05	-0.0376271

## Sheet: 3500
Specific Type	Model Type		RMSE (Validation)	MSE (Validation)	R2 (Validation)
Linear regression	Linear Regression	Tested	0.425248	0.180836	-52.9412
Interactions linear regression	Linear Regression	Canceled	NaN	NaN	NaN
Robust linear regression	Linear Regression	Failed	NaN	NaN	NaN
Stepwise linear regression	Stepwise Linear Regression	Canceled	NaN	NaN	NaN
Fine tree	Tree	Tested	0.177986	0.0316791	-0.0480594
Medium tree	Tree	Tested	0.178221	0.0317626	-0.0508232
Coarse tree	Tree	Tested	0.173857	0.0302264	-2.22045e-16
Linear SVM	SVM	Tested	0.0342726	0.00117461	0.649627
Quadratic SVM	SVM	Tested	0.0279633	0.000781944	0.766756
Cubic SVM	SVM	Tested	0.0360347	0.0012985	0.612673
Fine Gaussian SVM	SVM	Tested	0.0423358	0.00179232	0.465374
Medium Gaussian SVM	SVM	Tested	0.0369455	0.00136497	0.592846
Coarse Gaussian SVM	SVM	Tested	0.0441297	0.00194743	0.419105
Boosted trees	Ensemble	Tested	0.168867	0.028516	0.056585
Bagged trees	Ensemble	Tested	0.178209	0.0317586	-0.0506903
Squared exponential GPR	Gaussian Process Regression	Tested	0.0537803	0.00289232	0.137256
Matern 5/2 GPR	Gaussian Process Regression	Tested	0.0558639	0.00312078	0.0691099
Exponential GPR	Gaussian Process Regression	Tested	0.0581016	0.0033758	-0.00695812
Rational quadratic GPR	Gaussian Process Regression	Tested	0.0537803	0.00289232	0.137256
Narrow neural network	Neural Network	Tested	0.373583	0.139564	-40.6303
Medium neural network	Neural Network	Tested	0.464787	0.216027	-63.4382
Wide neural network	Neural Network	Tested	0.398465	0.158775	-46.3605
Bilayered neural network	Neural Network	Tested	0.146152	0.0213603	-5.37152
Trilayered neural network	Neural Network	Tested	0.179321	0.0321559	-8.5917
SVM kernel	Kernel	Tested	0.0495801	0.00245819	0.266753
Least squares regression kernel	Kernel	Tested	0.0713969	0.00509751	-0.520525

[truncated: 298 more sheets: 3510, 3520, 3530, 3600, 3610, 3620, 3630, 3650, 3710, 3720, 3740, 4210, 4300, 4310, 4320, 4400, 4410, 4420, 4430, 4500 …]
